# Supplementary material for: RASON promotes KRASG12C-driven tumor progression and immune evasion in non-small cell lung cancer
Source: Springer Nature journal article supplement (doi:10.1186/s13046-025-03369-9), 2025-03-25
Supplement: MOESM1 [file 13046_2025_3369_MOESM1_ESM.pdf]

Supplementary Figures for

**RASON promotes KRAS<sup>G12C</sup>-driven tumor progression and immune evasion in  
non-small cell lung cancer**

Jianzhuang Wu, Kexin Xie, Yixuan Zhang, Weiyi Zhang, Rongjie Cheng, Yaliang Zhang, Yugui Xia,

Tongyan Liu, Rong Yin, Yudong Qiu, Tao Xu, Rutian Li, Qi Sun, &Chao Yan

Corresponding authors: Chao Yan: [yanchao@nju.edu.cn](mailto:yanchao@nju.edu.cn)

& Qi Sun: [sunqi@njglyy.com](mailto:sunqi@njglyy.com)

**The PDF file include:**

Figs. S1 to S8

**Other Supplementary Materials for this manuscript include the following:**

Supplementary Table S1 to S7.



mice. Mice at the age of 6 weeks are subject to AAV injection to generate lung cancer models, undergo micro-CT testing, survival analysis and finally be euthanatized.

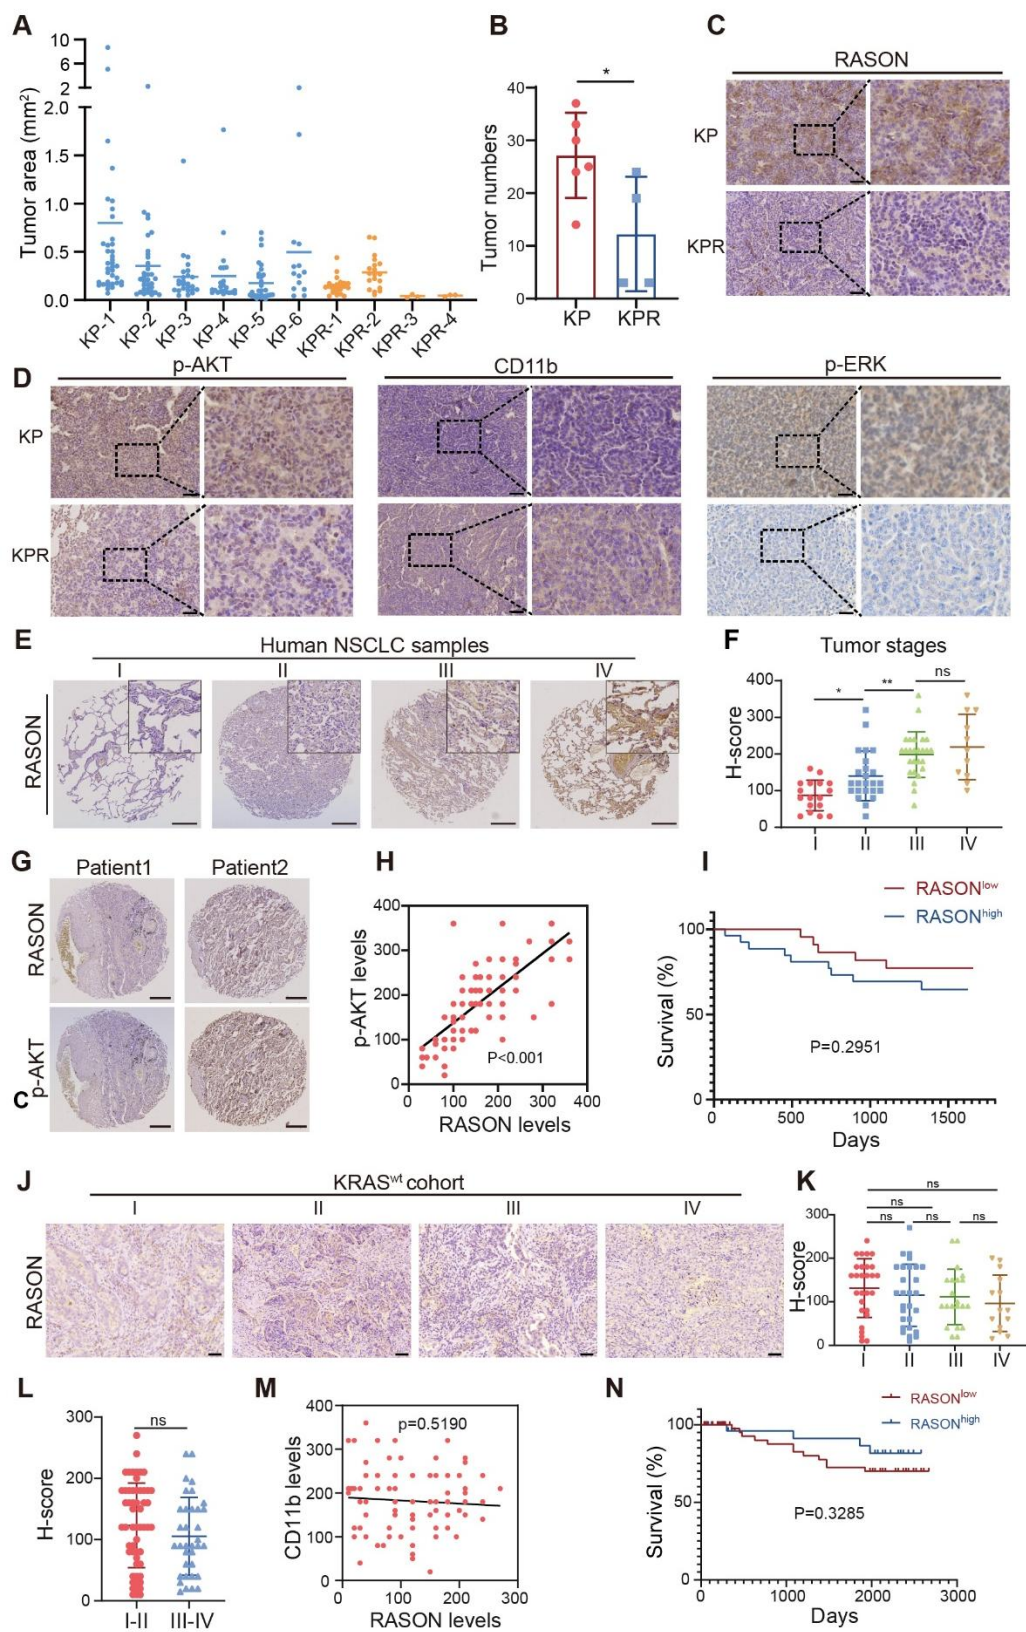

**Figure S2, relate to Figure 1**

**A**, Quantification of individual tumor areas of KP and KPR mice. **B**, Quantification of tumor numbers of KP and KPR mice. **C-D**, Representative immunohistochemistry showing p-AKT, p-ERK, and CD11b expression levels in lung tumors of KP and KPR mice. Scale bar, 50  $\mu$ m. **E**, Representative IHC images showing RASON expression in NSCLC samples across different tumor stages. Scale bar, 50  $\mu$ m. **F**, Dot plot showing H-score of RASON expression for NSCLC samples at different stages. **G**, Representative IHC images of RASON and p-AKT staining in NSCLC patient tissues. Scale bar, 50  $\mu$ m. **H**, Correlation analysis of RASON expression and p-AKT levels. **I**, Kaplan–Meier survival analysis of lung adenocarcinoma patients stratified into high and low RASON expression groups based on H-scores (n = 22 for the RASON-low group, n = 27 for the RASON-high group). **J**, Representative IHC images showing RASON expression in KRAS<sup>wt</sup> NSCLC samples across different tumor stages. Scale bar, 50  $\mu$ m. **K**, Dot plot showing H-score of RASON expression for KRAS<sup>wt</sup> NSCLC samples at different stages. **L**, Dot plot showing H-score of RASON expression for KRAS<sup>wt</sup> NSCLC samples at combined stages. **M**, Correlation analysis of RASON expression and CD11b levels in KRAS<sup>wt</sup> NSCLC samples. **N**, Kaplan–Meier survival analysis of KRAS<sup>wt</sup> NSCLC patients stratified into high and low RASON expression groups based on H-scores (n = 53 for the RASON-low group, n = 38 for the RASON-high group). Data are shown as mean  $\pm$  S.D. and analyzed by *Student's t-test* (B) or *one-way ANOVA* (F). \*  $p < 0.05$ , \*\*  $p < 0.01$ .

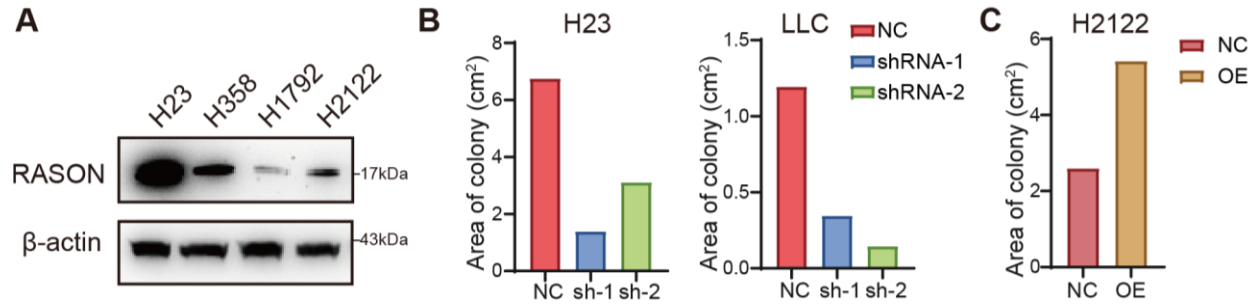

**Figure S3, relate to Figure 2**

**A**, Immunoblotting showing the relative RASON expression in human KRAS<sup>G12C</sup> mutant lung cancer cell lines. **B**, Quantitative analysis of colony areas in H23 and LLC with or without RASON KD. **C**, Quantitative analysis of colony areas in H2122 with or without RASON OE.

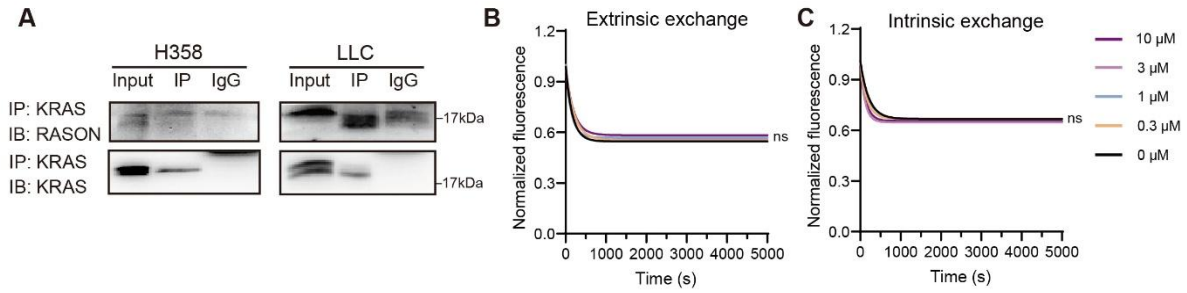

**Figure S4, relate to Figure 3**

**A**, Immunoprecipitation (IP) assay showing the mutual binding between RASON and KRAS in LLC.

**B-C**, Effects of RASON on SOS1-catalysed (**B**) and intrinsic (**C**) nucleotide exchange rate of KRAS<sup>G12C</sup> measured by nucleotide exchange assays.



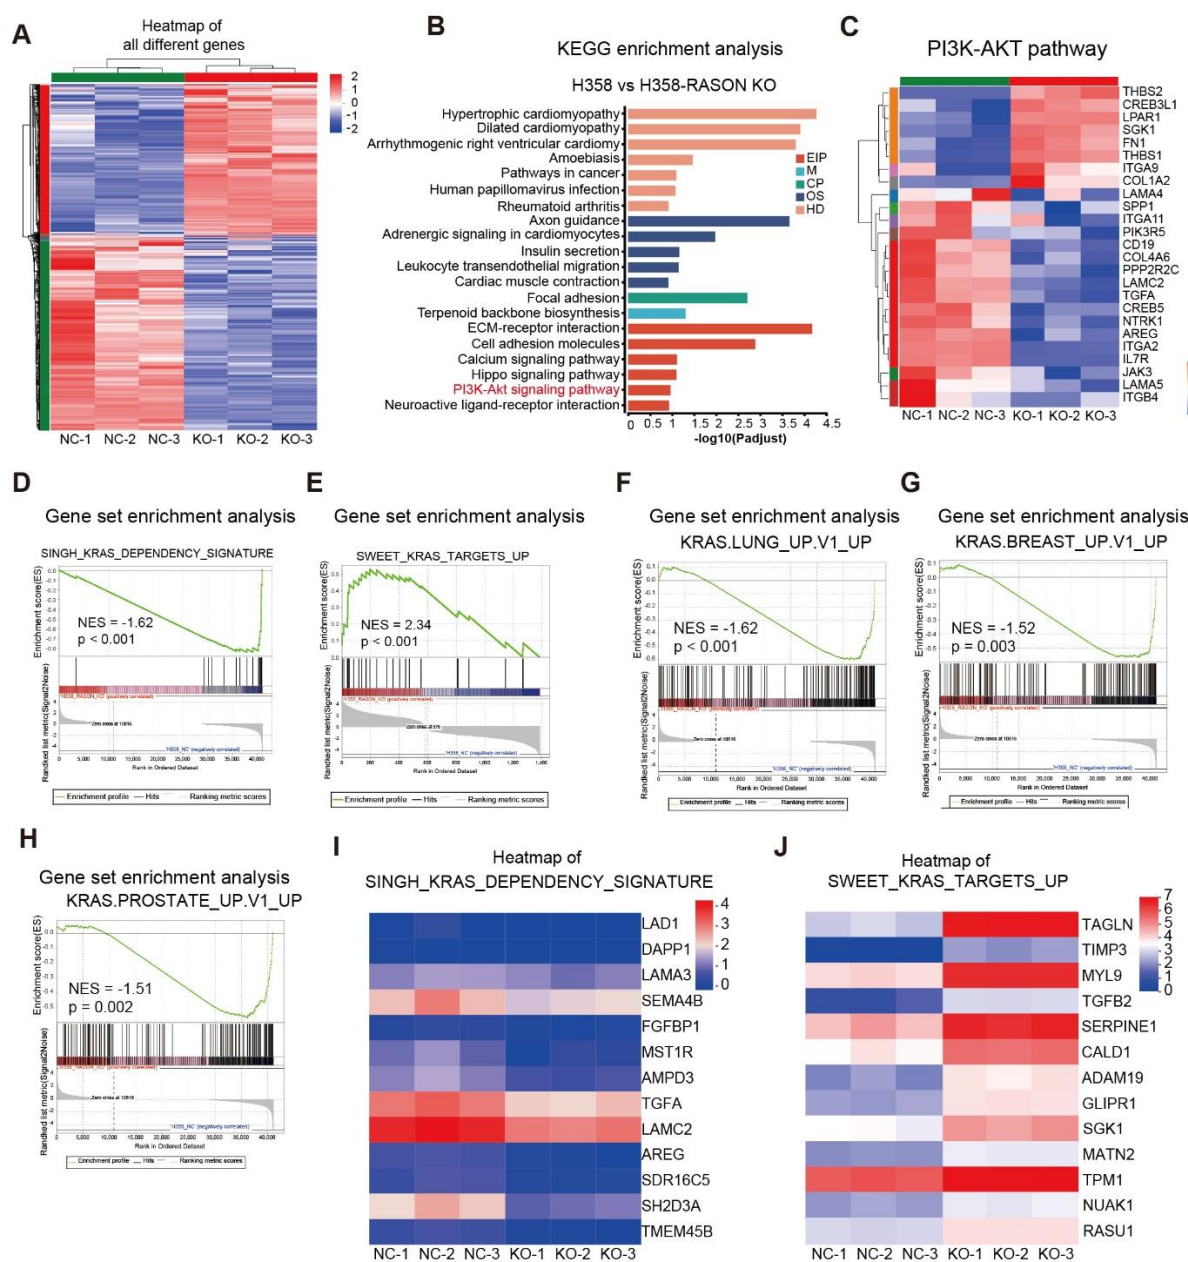

**Figure S5, relate to Figure 3**

**A**, Heatmap of Differential Gene Expression analysis of RNA-seq in H358 and H358-RASON KO cells. **B**, KEGG analysis of changes in pathways in H358-RASON KO cells. **C**, Heatmap comparing the expression of PI3K-AKT pathway genes between parental and RASON-KO H358 cells. **D-H**, GSEA plots showing the enrichment of "SWEET\_KRAS\_TARGETS\_UP" and the depletion of the



"SINGH\_KRAS\_DEPENDENCY\_SIGNATURE", "KRAS\_LUNG\_UP", "KRAS\_BREAST\_UP", and "KRAS\_PROSTATE\_UP" signatures in H358 RASON-KO cells. **I**, Expression profiling heatmap of "SINGH\_KRAS\_DEPENDENCY\_SIGNATURE " gene set in H358 and H358-RASON KO cells. **J**, Expression profiling heatmap of "SWEET\_KRAS\_TARGETS\_UP" gene set in H358 and H358-RASON KO cells.

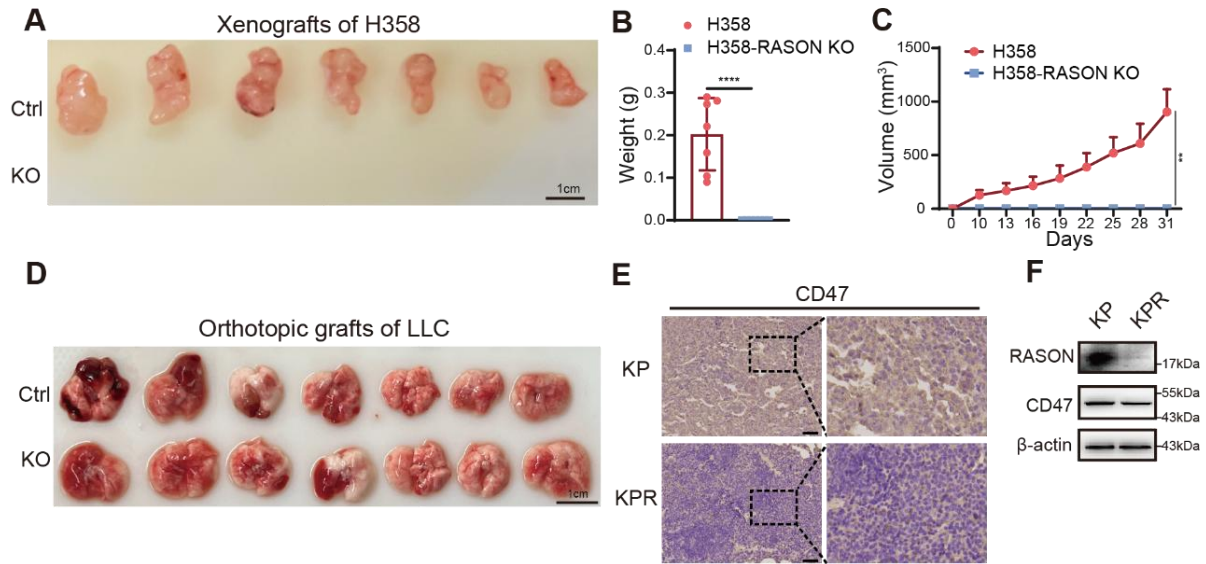

**Figure S6, relate to Figure 4**

**A-C**, Effects of RASON KO on subcutaneous MEF<sup>G12C</sup> tumorigenesis *in vivo*. **(A)** Representative images of MEF<sup>G12C</sup>-derived tumors in C57 mice. Scale bar, 1 cm. **(B, C)** Quantitative analysis of tumor weights and volumes (n = 7 per group). **D**, Representative images of LLC orthotopic grafts with and without RASON KO. Scale bar, 1 cm. **E**, Immunohistochemistry staining showing expression level of CD47 in lung tumors of KP and KPR. Scale bar, 50 μm. **F**, Immunoblotting showing the effect of RASON knockdown on CD47 expression. Data are shown as mean ± S.D. and analyzed by Student's t-test (B, C). \*\* p<0.01; \*\*\*\* p<0.0001.

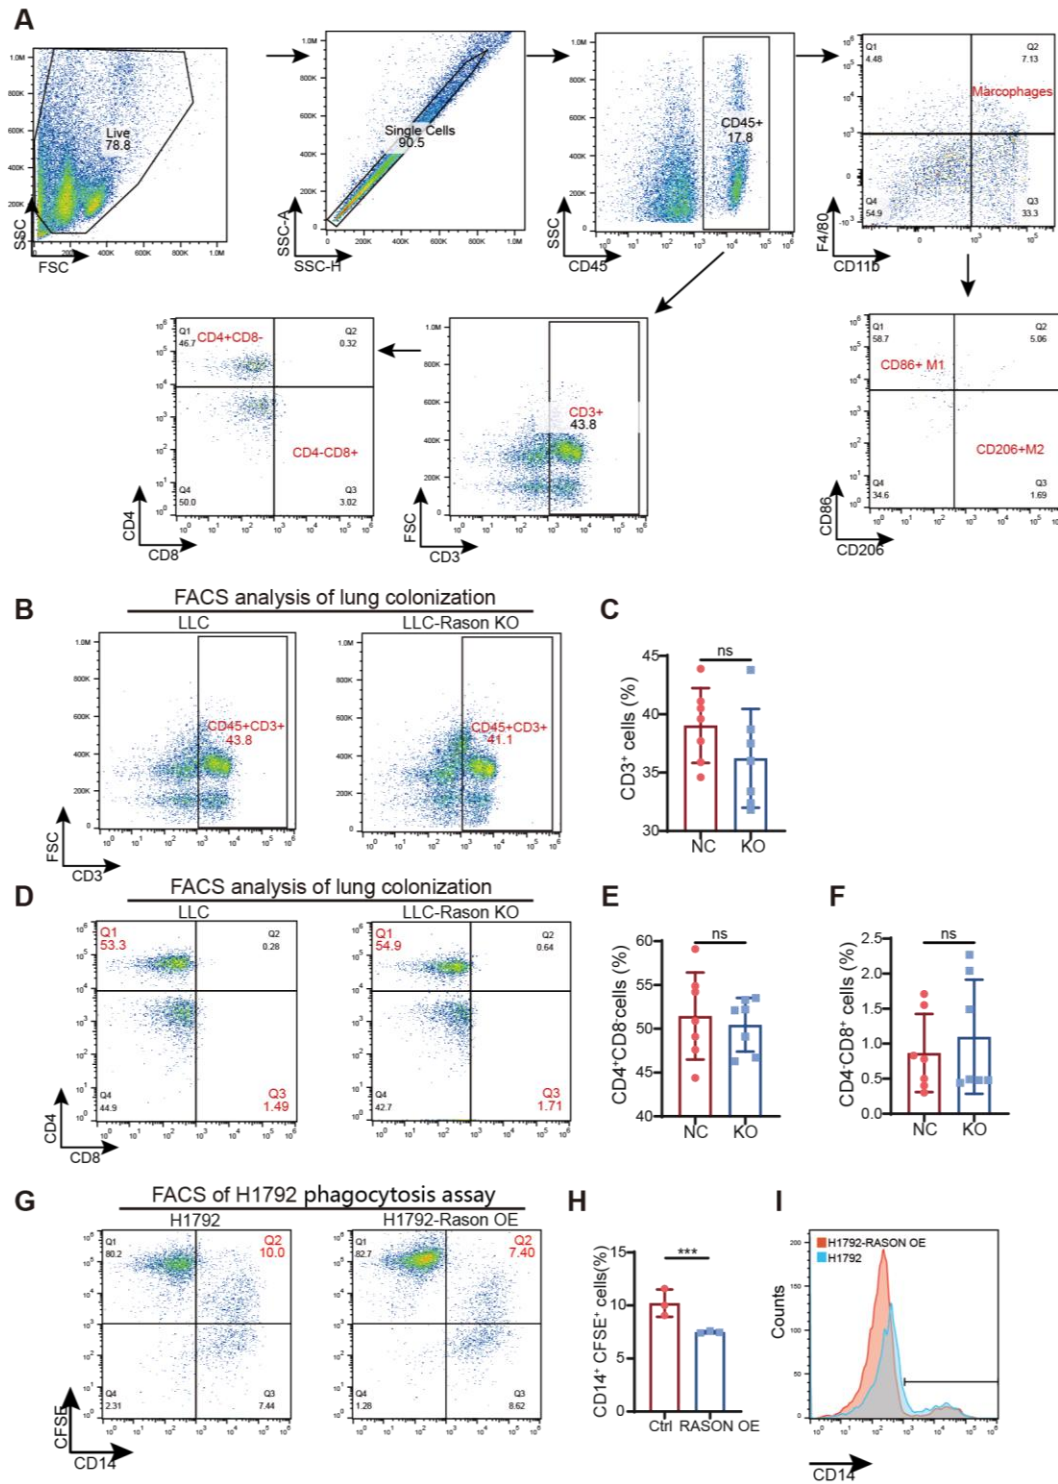

**Figure S7, relate to Figure 5**

A, Schematic gating strategy of identifying LLC orthotopic graft cells by flow cytometry. B-C,

Percentage of CD3<sup>+</sup> T cells detected by flow cytometry. Representative FACS images (B) and corresponding quantitative analysis results (C). **D-F**, Percentage of CD4<sup>+</sup> and CD8<sup>+</sup> T cells detected by flow cytometry. Representative FACS images (D) and corresponding quantitative analysis results of CD4<sup>+</sup> T cells (E) and CD8<sup>+</sup> T cells (F). **G-I**, Macrophage phagocytosis detected by flow cytometry. Representative FACS images (G) and corresponding quantitative analysis results of phagocytosis occurrence in H2111 and H2122-RASON OE (H, I). Data are shown as mean  $\pm$  S.D. and analyzed by *Student's t-test* (C, E, F, H). \*\*\*  $p < 0.001$ .

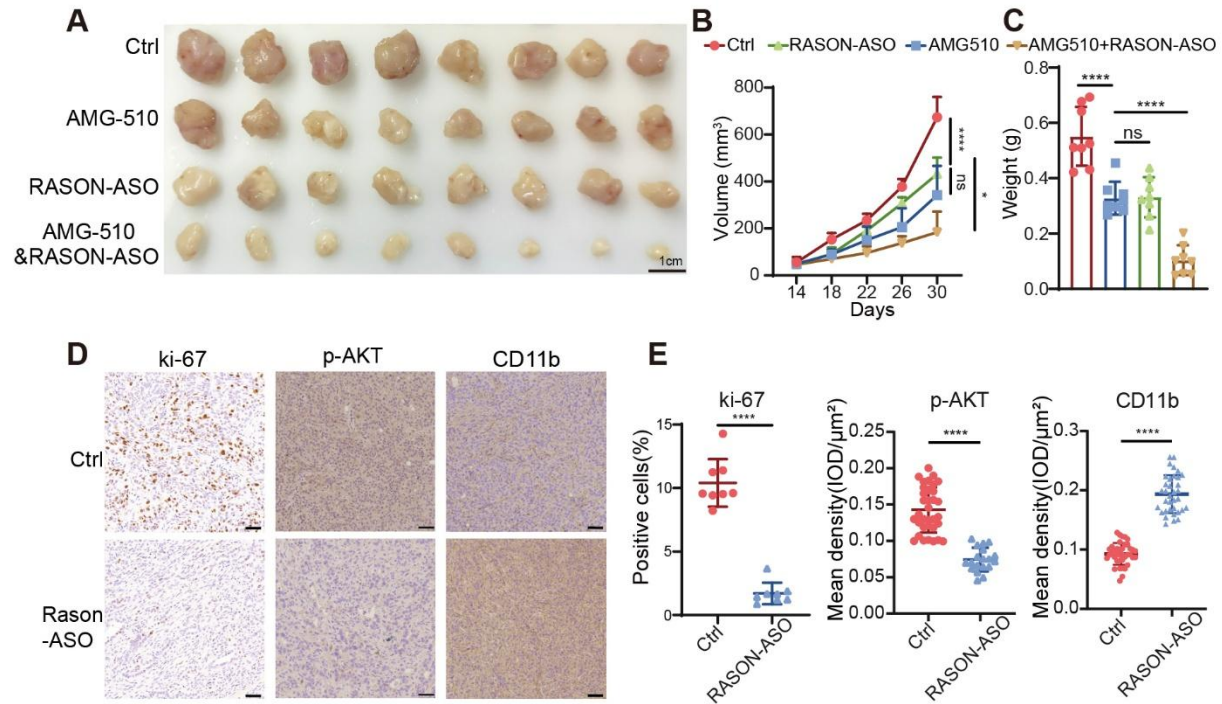

**Figure S8, relate to Figure 6**

**A-C**, Synergetic effect of RASON antisense oligonucleotides (ASO) and AMG510 treatment on H23 xenografts. (A) Representative xenograft images. Scale bar, 1 cm. (B) Quantitative analysis of tumor volumes. (B) Quantitative analysis of tumor weights. **D-E**, IHC staining and quantitative analysis of ki-67, p-AKT, and CD11b. Scale bar, 50 μm. Data are shown as mean ± S.D. and analyzed by *one-way ANOVA* (B) or *Student's t-test* (C, E). \*\*\*\*  $p < 0.0001$ .
